# Supplementary material
Source: PubMed Central journal article supplement (PMC2952214)
Supplement: supp_M110.113332_jbc.M110.113332-1.pdf [file supp_M110.113332_jbc.M110.113332-1.pdf]

**Cys-Less**

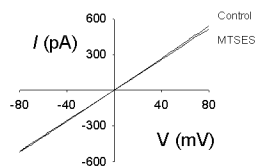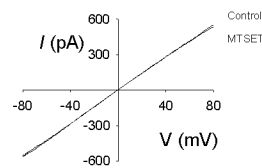

**R334C**

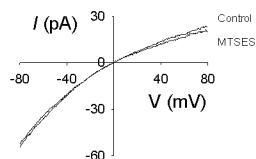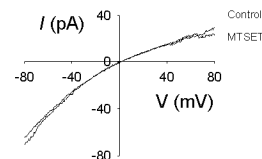

**K335C**

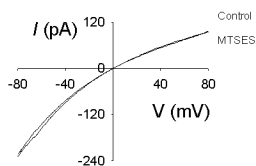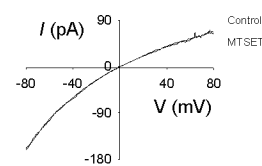

**I336C**

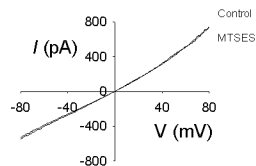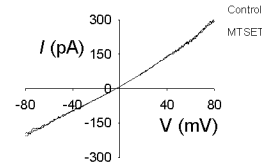

**F337C**

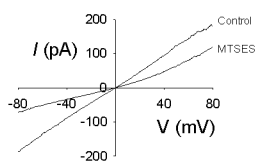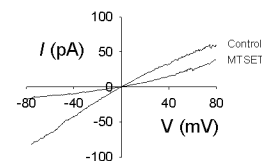

**T338C**

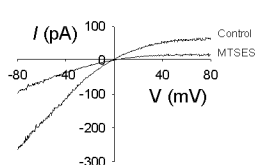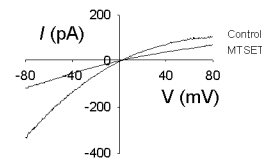

**T339C**

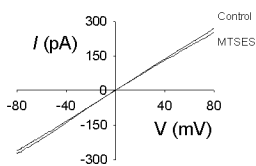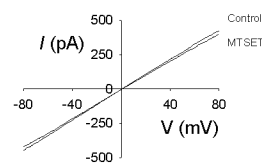

**I340C**

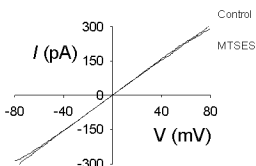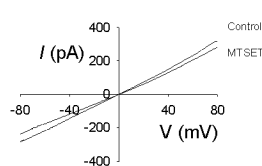

Figure S1 (A)

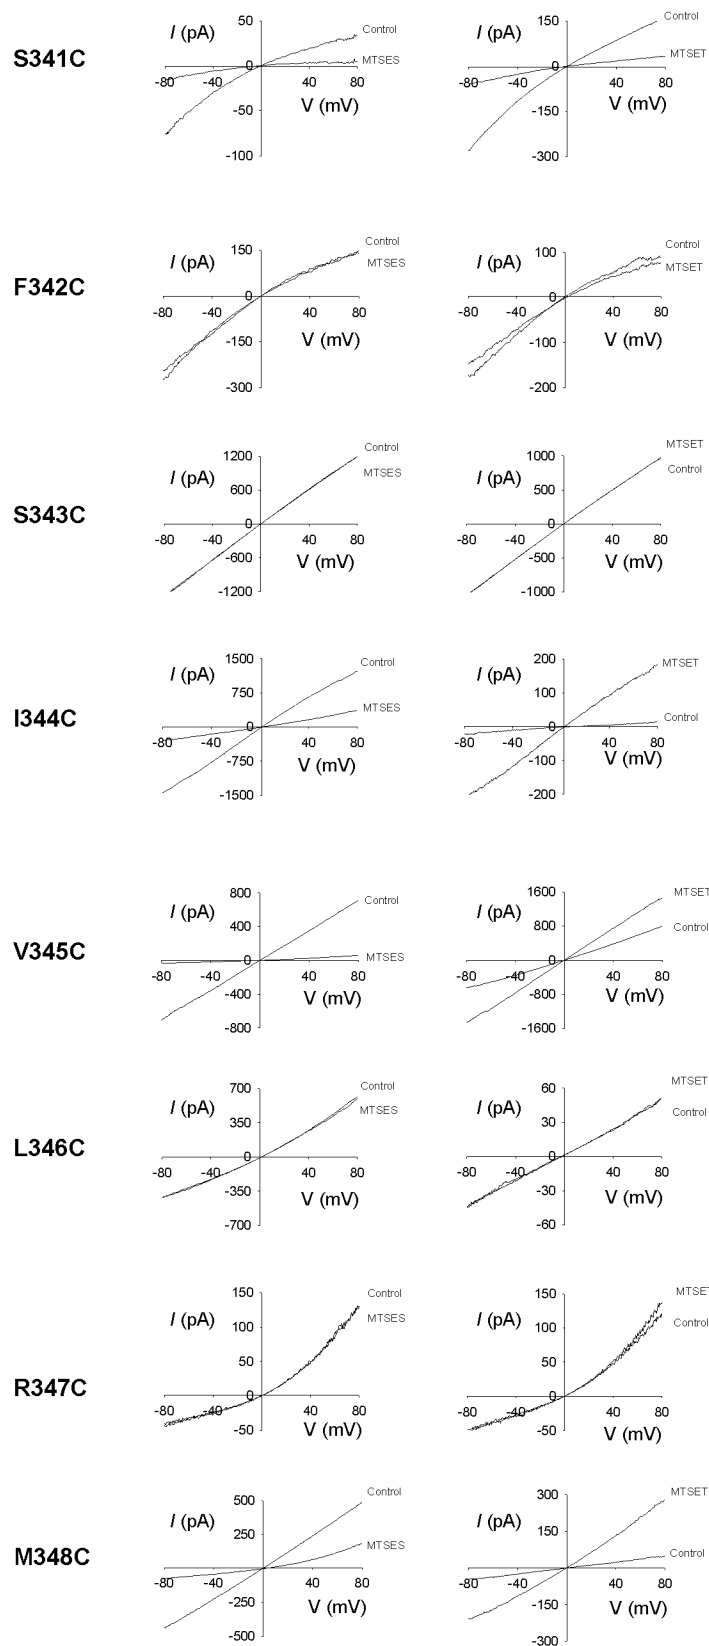

Figure S1 (B)

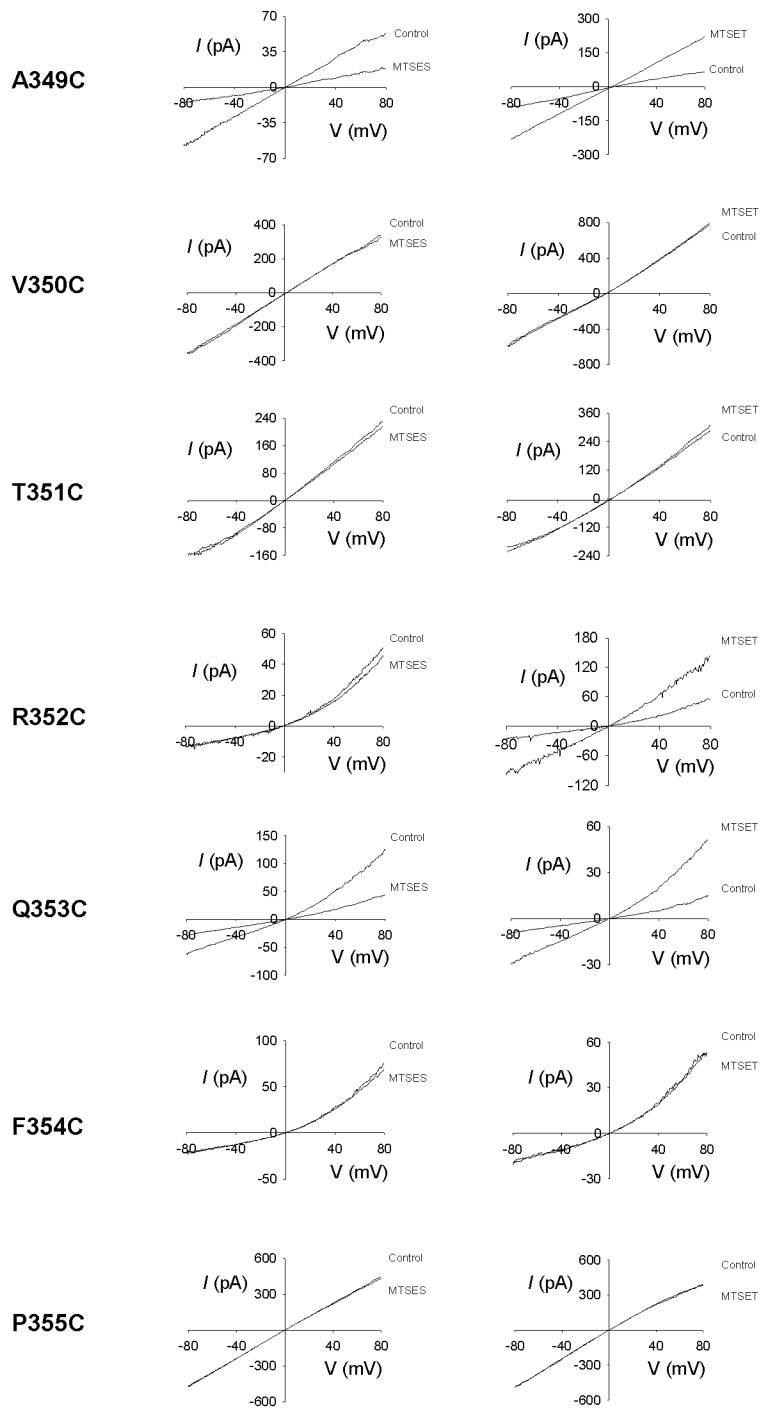

Figure S1 (C)

**A. Pretreatment with 200  $\mu$ M MTSES alone**

Time of pretreatment :     0 s

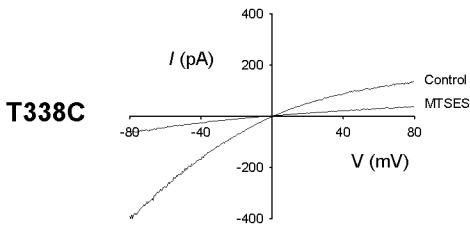

$I_{\text{MTSES}} / I_{\text{Control}} :$      **0.21**

120 s

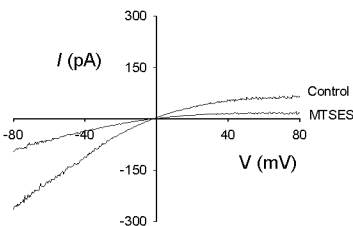

**0.16**

300 s

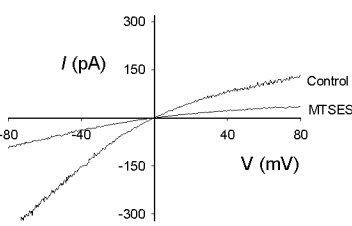

**0.15**

Time of pretreatment :     0 s

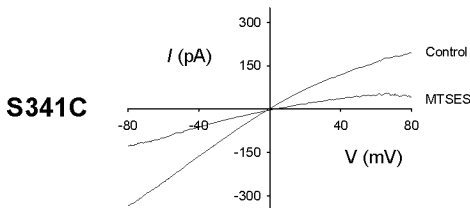

$I_{\text{MTSES}} / I_{\text{Control}} :$      **0.40**

120 s

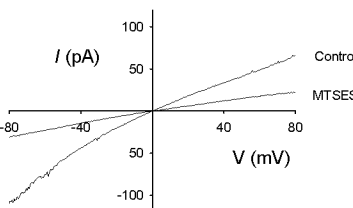

**0.31**

300 s

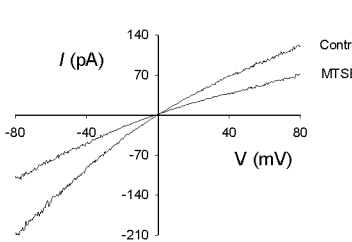

**0.48**

Time of pretreatment :     0 s

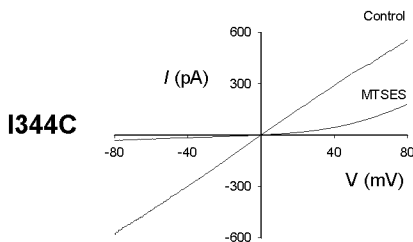

$I_{\text{MTSES}} / I_{\text{Control}} :$      **0.08**

120 s

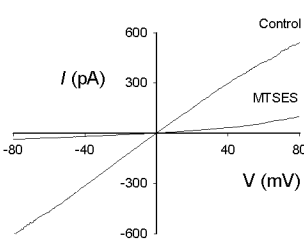

**0.09**

300 s

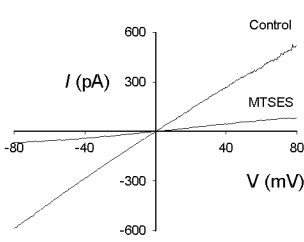

**0.11**

Figure S2 (A)

B. Pretreatment with 20 μM MTSES alone

Time of pretreatment :

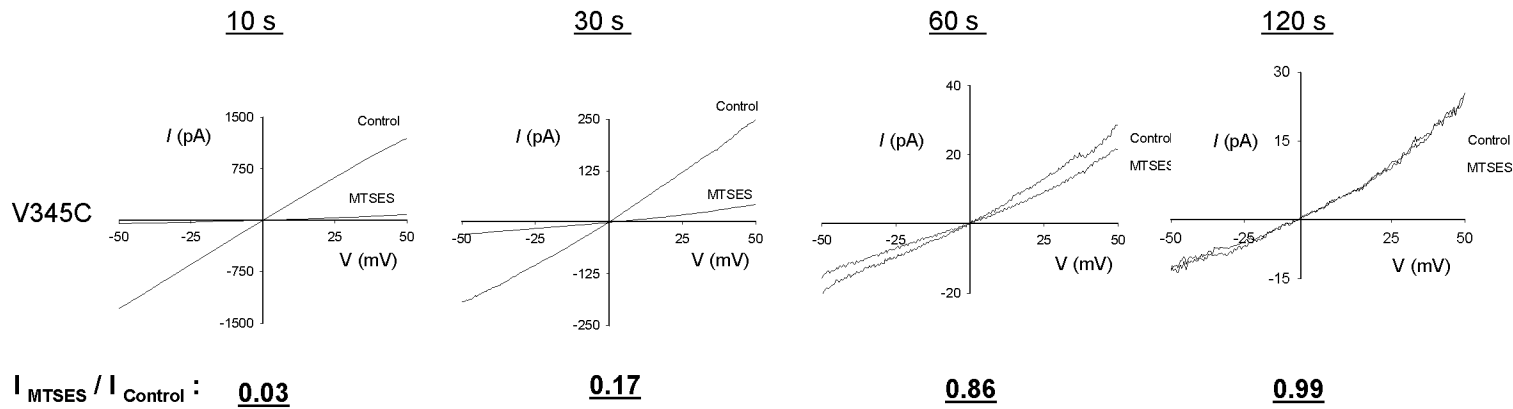

Time of pretreatment :

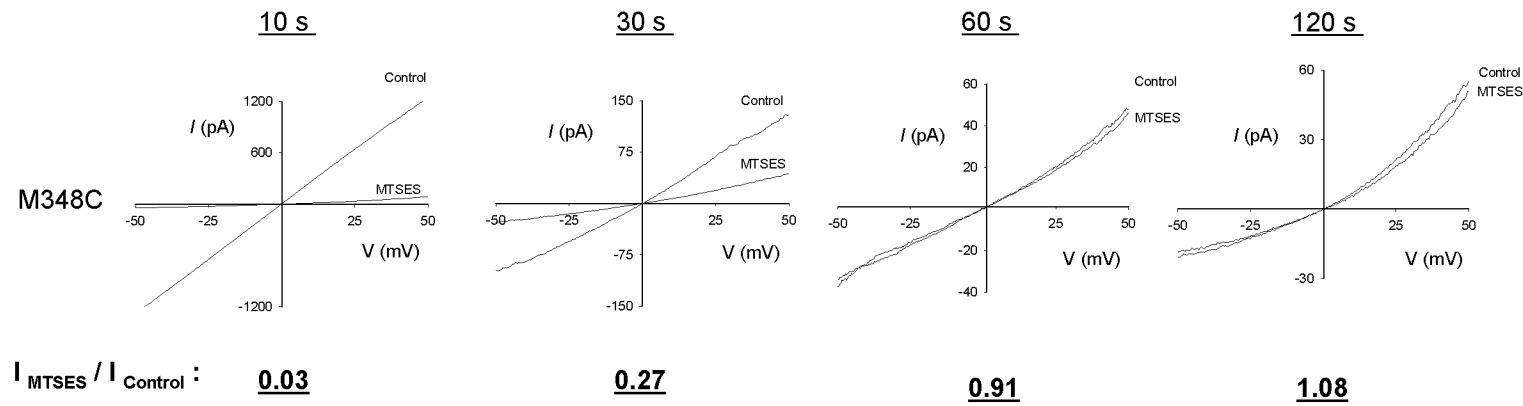

Figure S2 (B)

### A. Pretreatment with 1mM $\text{Au}(\text{CN})_2^-$ alone

Time of pretreatment : 0 s

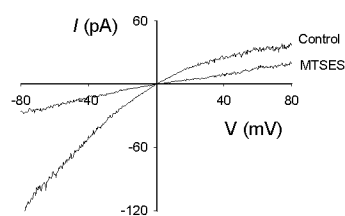

$I_{\text{MTSES}} / I_{\text{Control}} :$  **0.21**

120 s

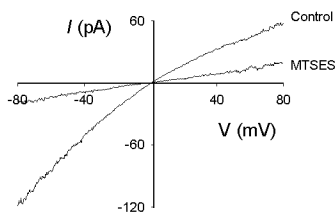

**0.16**

300 s

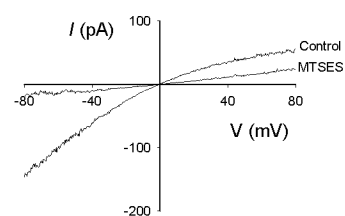

**0.15**

### B. Pretreatment with 2 $\mu\text{M}$ $\text{Au}(\text{CN})_2^-$ , ATP and PKA

Time of pretreatment : 0 s

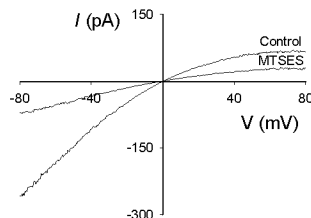

$I_{\text{MTSES}} / I_{\text{Control}} :$  **0.28**

10 s

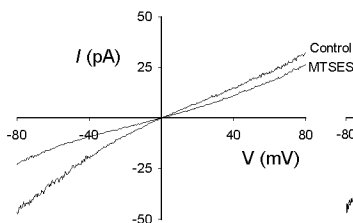

**0.50**

30 s

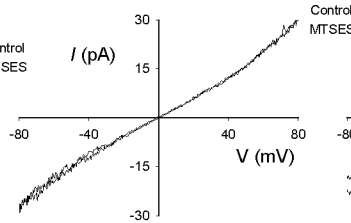

**1.02**

60 s

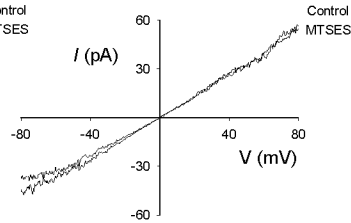

**0.96**

Figure S3

**Figure S1      Modification of cysteine-substituted CFTR-TM6 mutants by internal MTS reagents.**  
Example leak subtracted *I-V* relationships for all channel variants used in the present study, recorded from inside-out membrane patches following maximal channel activation with PKA (20 nM), ATP (1 mM) and PPi (2 mM). Currents were recorded before (Control) and after application of MTSES (200  $\mu$ M, left panels), or MTSET (2 mM, right panels) to the intracellular (bath) solution.

**Figure S2      Timecourse of modification of introduced cysteines during pretreatment with internal MTSES.** *A, B*, example leak-subtracted *I-V* relationships for each of five mutants (T338C, S341C, I334C, V345C, M348C) as indicated, showing the effects of application of internal MTSES (200  $\mu$ M) following maximal channel activation with PKA (20 nM), ATP (1 mM) and PPi (2 mM). Patches have been pretreated with MTSES, either 200  $\mu$ M (*A*) or 20  $\mu$ M (*B*) for the pretreatment time indicated above each *I-V* relationship. Below each *I-V* relationship is the measured MTSES sensitivity of the current following pretreatment ( $I_{\text{MTSES}} / I_{\text{Control}}$ ) for that patch. Similar data averaged across multiple patches was used to generate the data shown in Fig. 5B.

**Figure S3      Timecourse of modification of T338C during pretreatment with internal  $\text{Au}(\text{CN})_2^-$ .** *A, B*, example leak-subtracted *I-V* relationships for T338C showing the effects of application of internal MTSES (200  $\mu$ M) following maximal channel activation with PKA (20 nM), ATP (1 mM) and PPi (2 mM). Patches have been pretreated in two different ways: *A*, pretreated with 1 mM  $\text{Au}(\text{CN})_2^-$ ; *B*, pretreated with 2  $\mu$ M  $\text{Au}(\text{CN})_2^-$ , 20 nM PKA, and 1 mM ATP. In both *A* and *B*, the duration of pretreatment is indicated above each *I-V* relationship. Below each *I-V* relationship is the measured MTSES sensitivity of the current following pretreatment ( $I_{\text{MTSES}} / I_{\text{Control}}$ ) for that patch. Similar data averaged across multiple patches was used to generate the data shown in Fig. 8; data such as that shown in *A* for Fig. 8A, and data such as that shown in *B* for Fig. 8B.
